# Supplementary material for: Bovine Rectoanal Junction In Vitro Organ Culture Model System to Study Shiga Toxin-Producing Escherichia coli Adherence
Source: MDPI journal article supplement (doi:10.3390/microorganisms11051289), 2023-05-15
Supplement: s1 [file s1]

**Dr. Indira Kudva**

**Histopathology Results**

**IVOC samples, 9-27-21**

**NB A&B, K12 A&B, ATCC 43895 A and B**

**by**

**Dr. Mitchell Palmer**

## Summary

- All NB samples of rectoanal junction have both squamous and glandular portions present. All have mucosa that is normal in appearance with intact epithelium.
- All K12 samples of rectoanal junction have both squamous and glandular portions present. There is a very small area of mucosal disruption on K12B that could be due to tissue handling.
- All ATCC 43895 samples of rectoanal junction have both squamous and glandular portions present. There is a very small area of mucosal disruption on A that is likely due to tissue handling. There is a very small area of mucosal disruption on slide B.
- Squamous regions on all slides were unremarkable.

IVOC NBA  
9-27-21

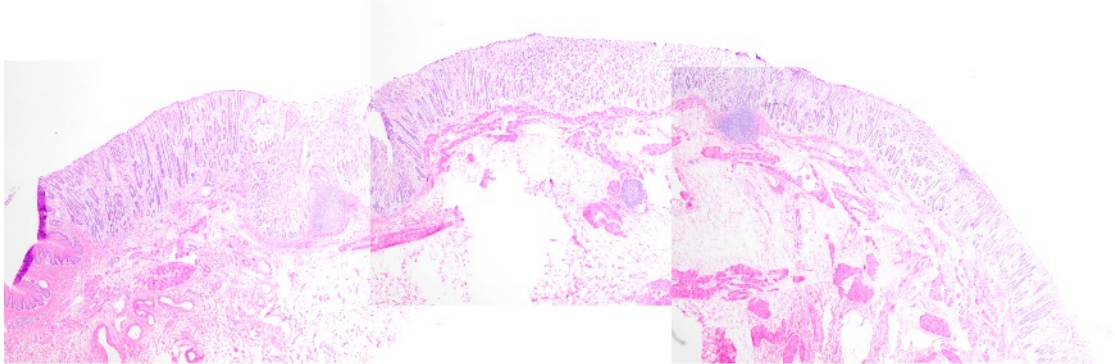

NBA 9-27-21

These are sections of rectoanal junction with both glandular and squamous regions present. The glandular mucosa is intact. The squamous portion is unremarkable.

IVOC NBB  
9-27-21

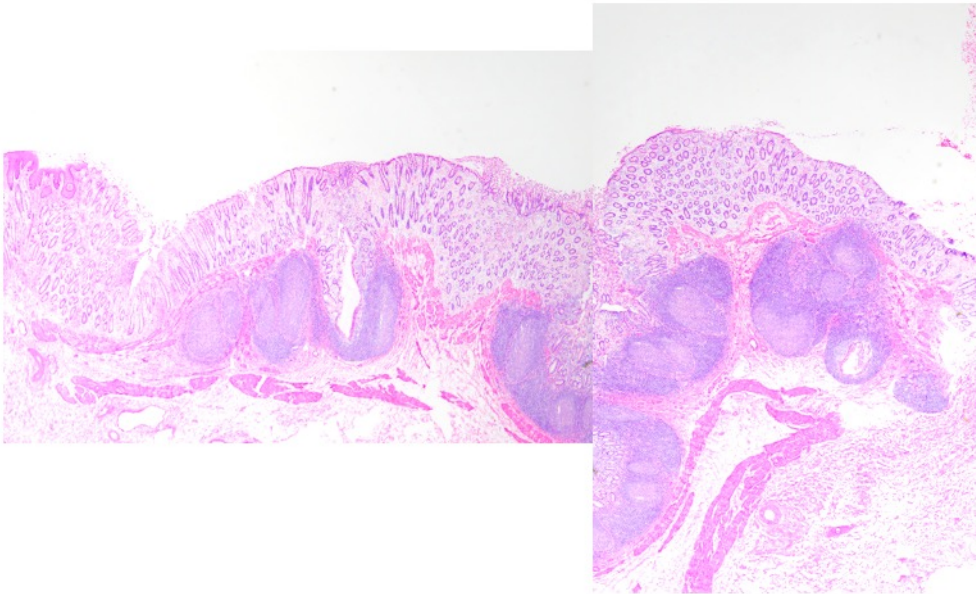

NBB 9-27-21

These are sections of rectoanal junction with both glandular and squamous regions present. The glandular mucosa is intact. The squamous portion is unremarkable.

IVOC K12A  
9-27-21

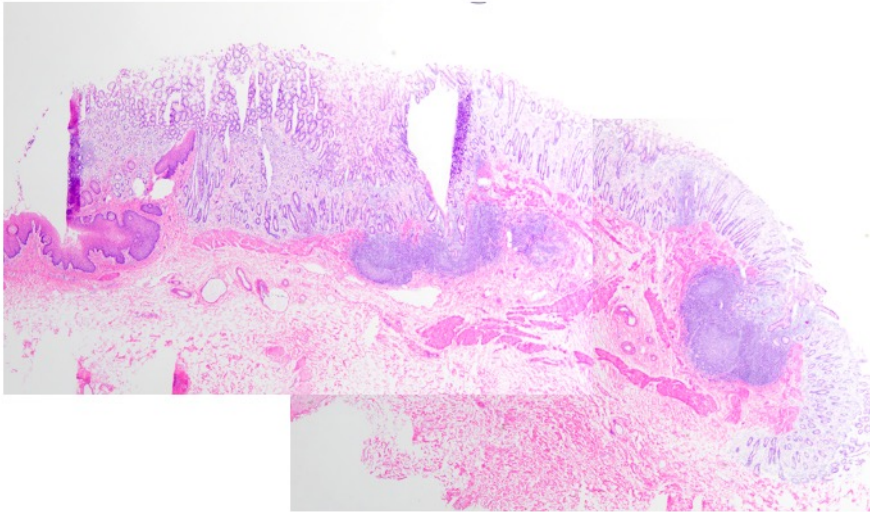

K12A (9-27-21)

These are sections of rectoanal junction with both glandular and squamous regions present. The glandular mucosa is intact. The squamous portion is unremarkable.

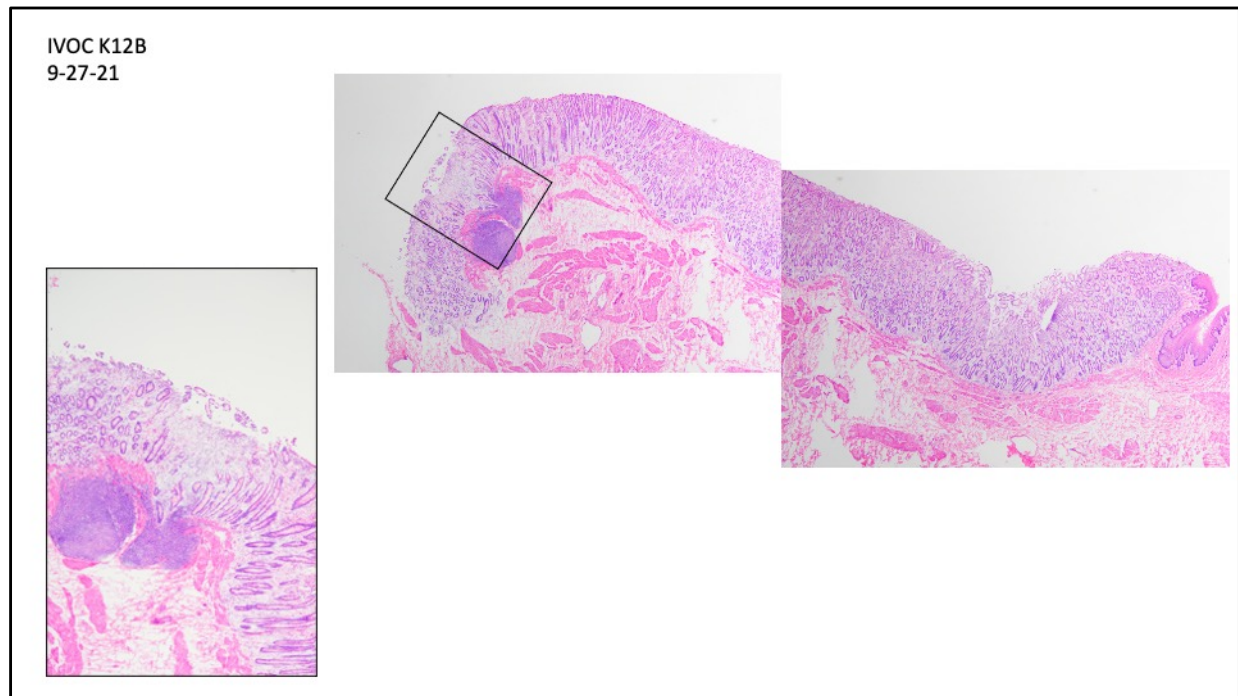

**K12B (9-27-21)**

These are sections of rectoanal junction with both glandular and squamous regions present. There is a small area of very mild disruption toward the end of the section. This could be artifact due to tissue handling. The squamous portion is unremarkable.

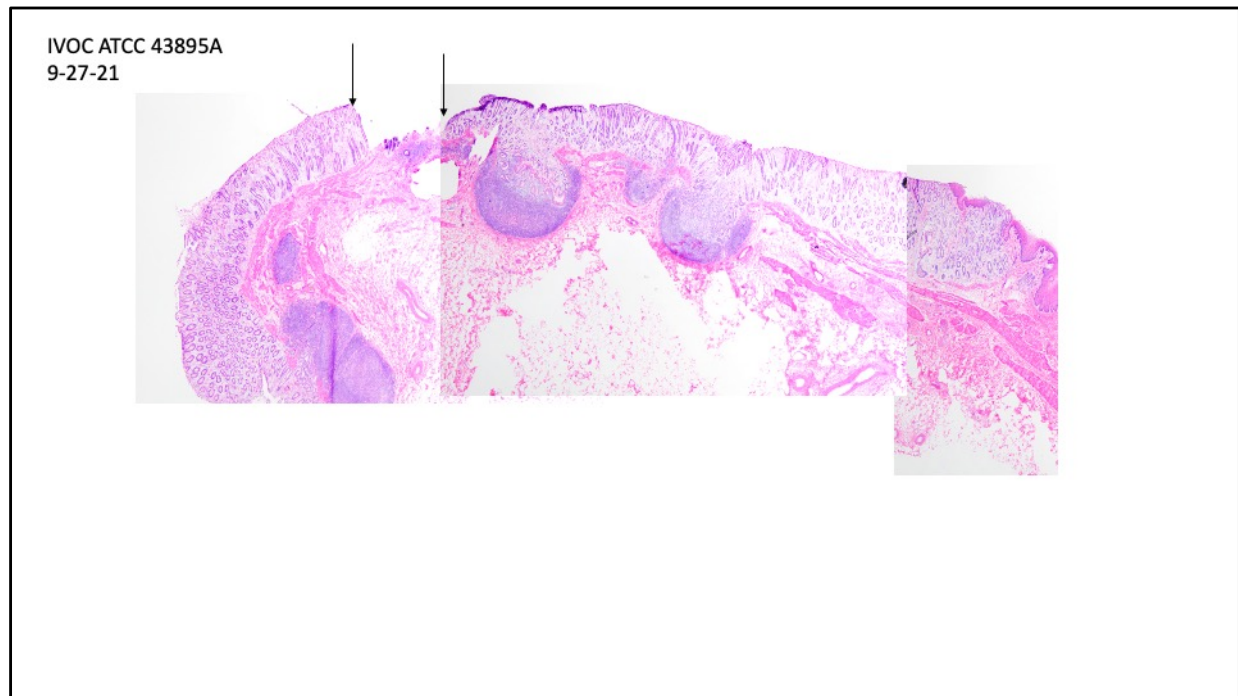

ATCC 43895A (9-27-21)

These are sections of rectoanal junction with both glandular and squamous regions present. There is a small area of very mild disruption (arrows). The sharply demarcated nature of this area suggests that this could be artifact due to tissue handling. The squamous portion is unremarkable.

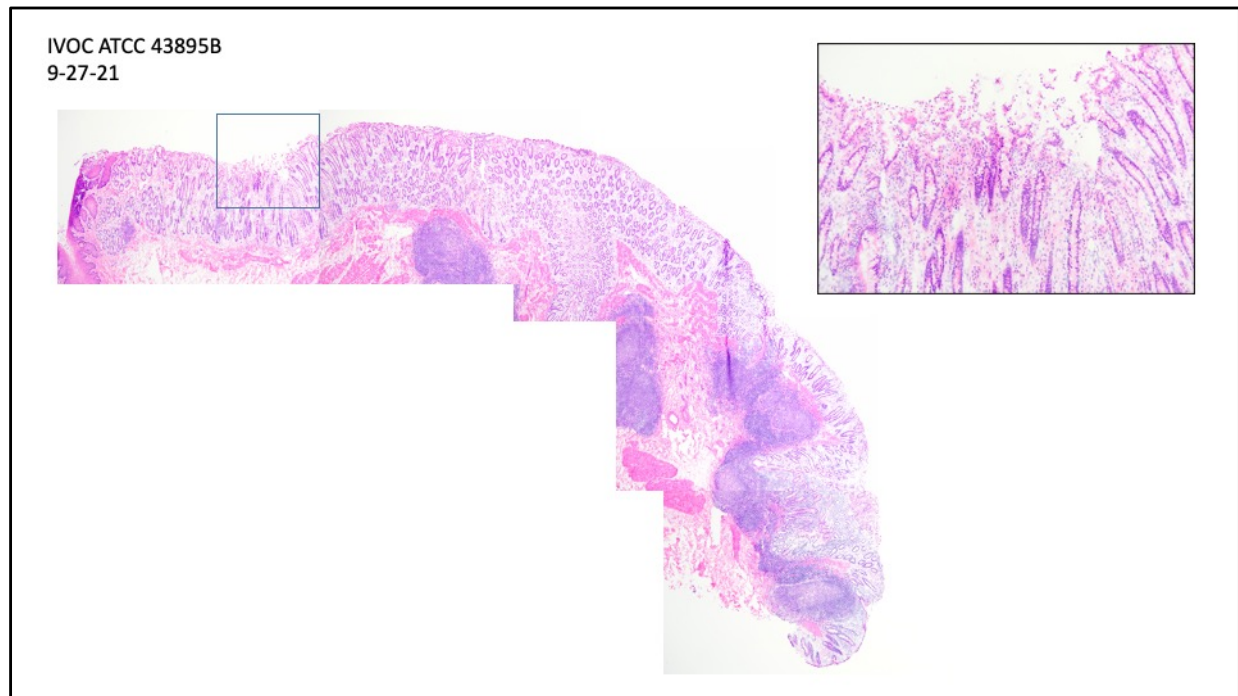

**ATCC 43895B (9-27-21)**

These are sections of rectoanal junction with both glandular and squamous regions present. There is a small area of very mild disruption (box). The squamous portion is unremarkable.
