# Supplementary material for: Bovine Rectoanal Junction In Vitro Organ Culture Model System to Study Shiga Toxin-Producing Escherichia coli Adherence
Source: MDPI journal article supplement (doi:10.3390/microorganisms11051289), 2023-05-15
Supplement: s1 [file s1]

**Dr. Indira Kudva**

**Histopathology Results**

**IVOC samples**

**3-30-22**

**5-18-22**

**6/8/22**

**by**

**Dr. Mitchell Palmer**

## Summary

- Pre-assay sections have excellent tissue integrity in all regions.
- Of the sections with no bacteria, 2 of them have one to several small areas of superficial mucosal disruption in the columnar region.
- Of the sections with E. coli K12, 3 of them have one to several small areas of superficial mucosal disruption in the columnar region.
- Two sections containing ATCC/EDL933 have significant superficial mucosal disruption affecting 25->50% of length of the mucosa; other sections have multiple superficial mucosal disruptions.
- Squamous regions on all slides were unremarkable.

3-30-22  
Pre-assay

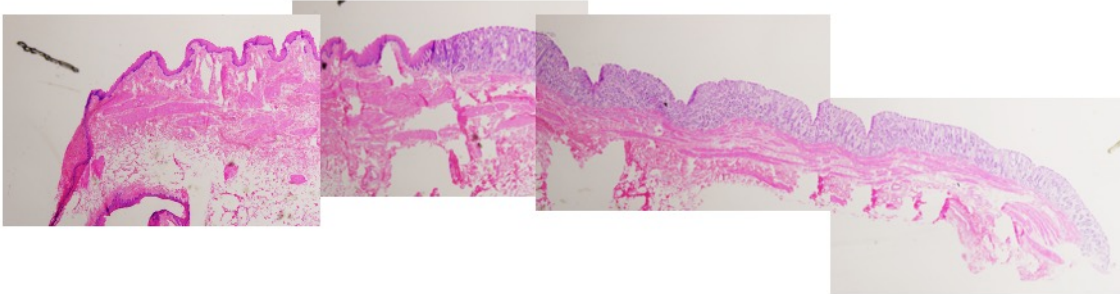

3-30-22  
Pre-assay  
Excellent tissue integrity in all regions.

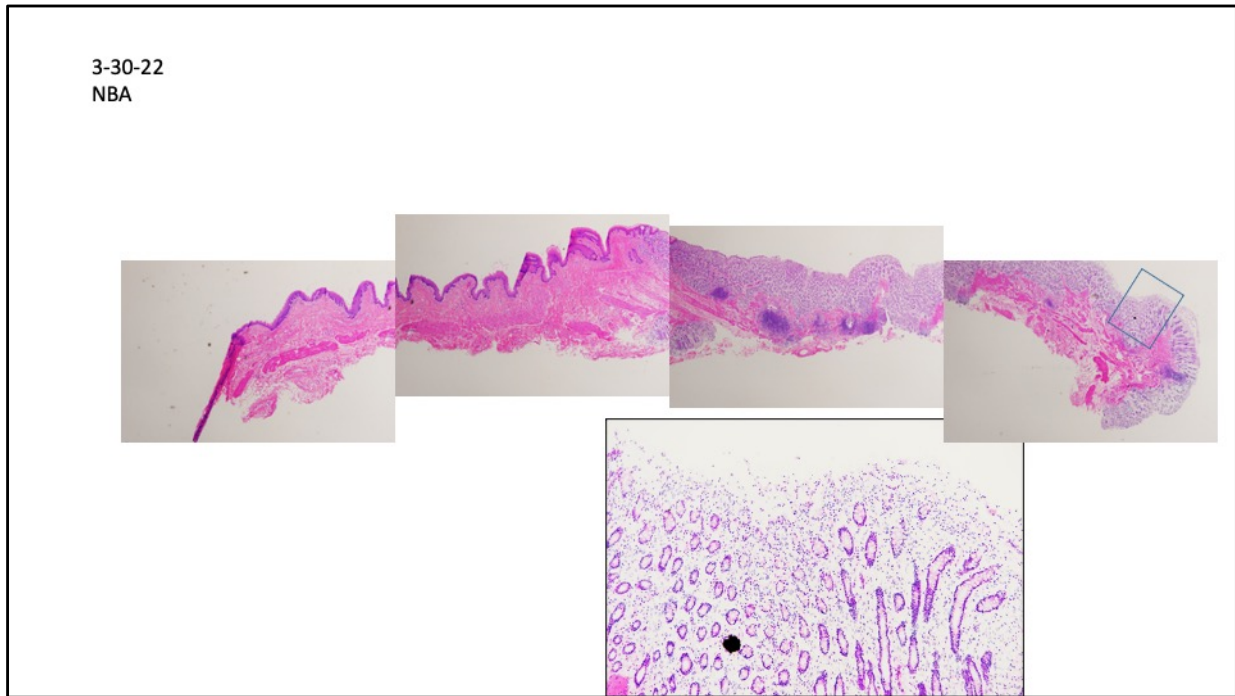

3-30-22

NBA

Small superficial disruption of mucosal epithelium.

Moderate amount of GALT.

Normal squamous region.

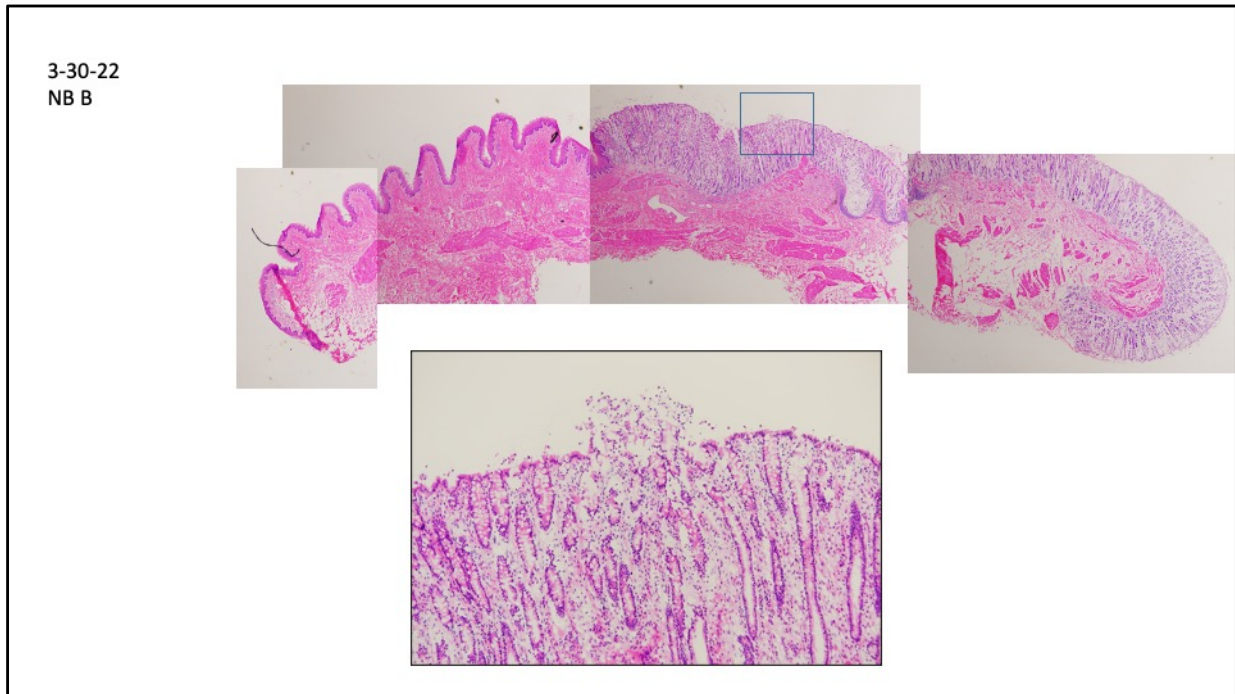

3-30-22

NB B

Several small superficial disruptions of mucosal epithelium in columnar region.

Moderate amounts of GALT.

Normal squamous region.

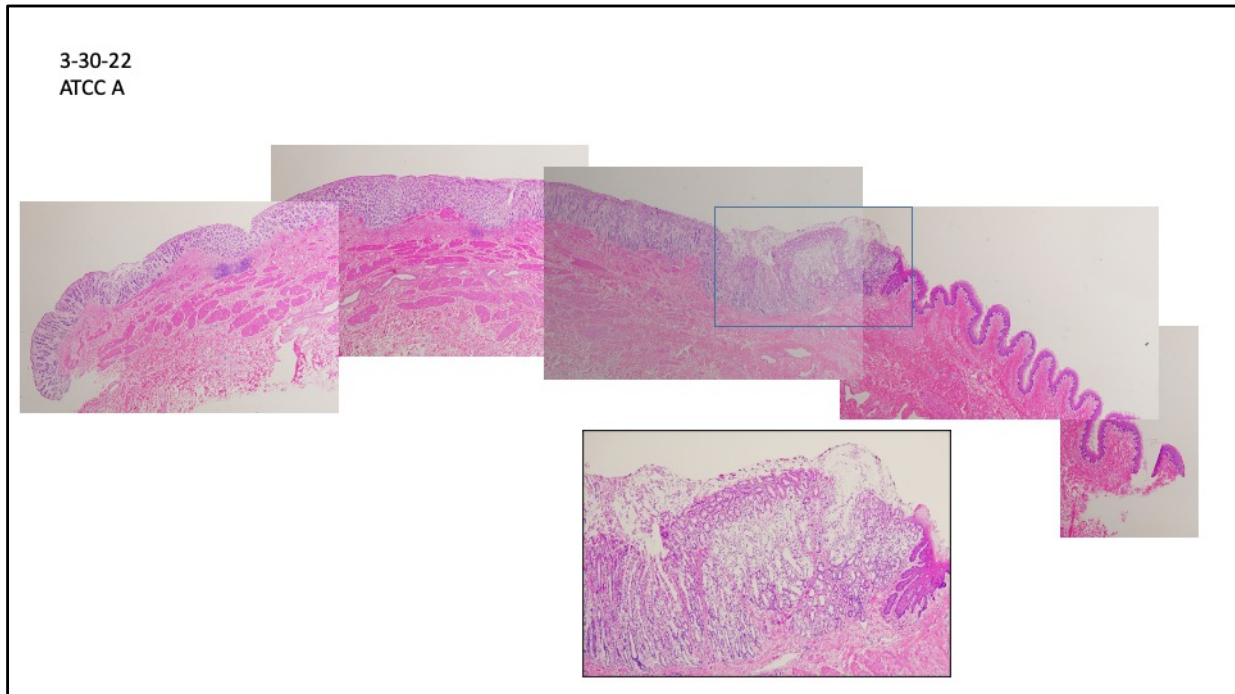

3-30-22

ATCC A

Multiple superficial to mid-level regions of mucosal disruption in columnar region.

Small amount of GALT.

Normal squamous region.

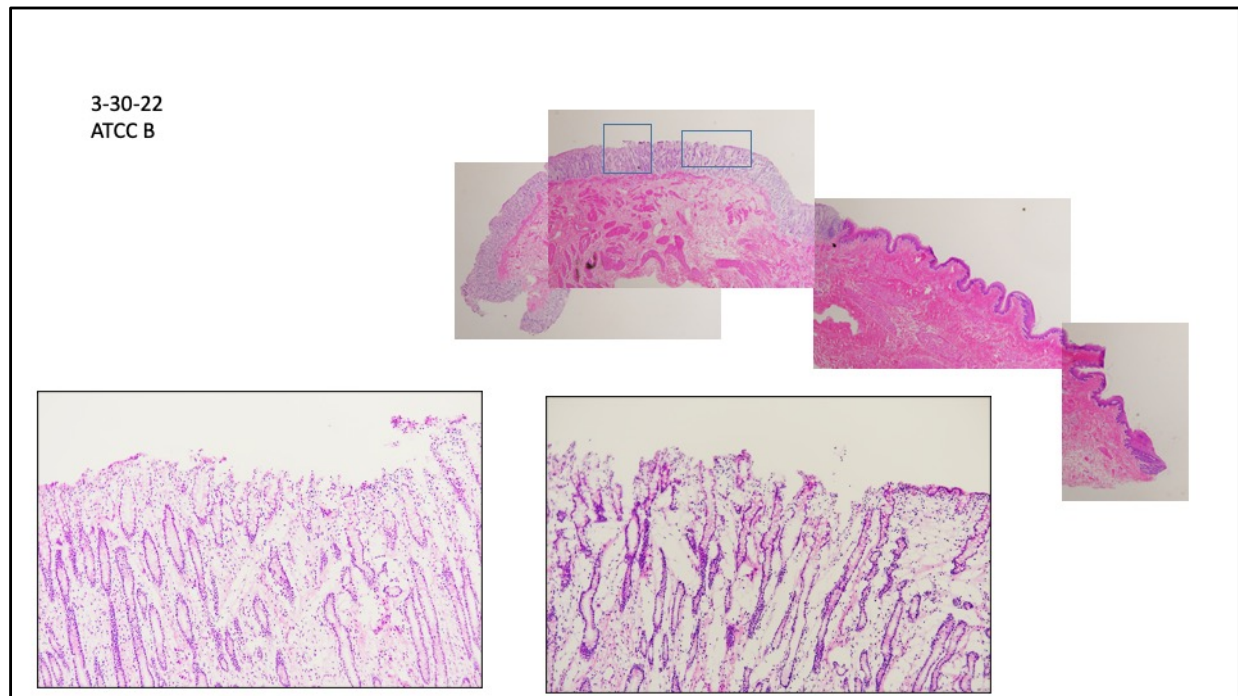

3-30-22

ATCC B

Multiple small areas of superficial mucosal disruption in columnar region.

Small amount of GALT.

Normal squamous region.

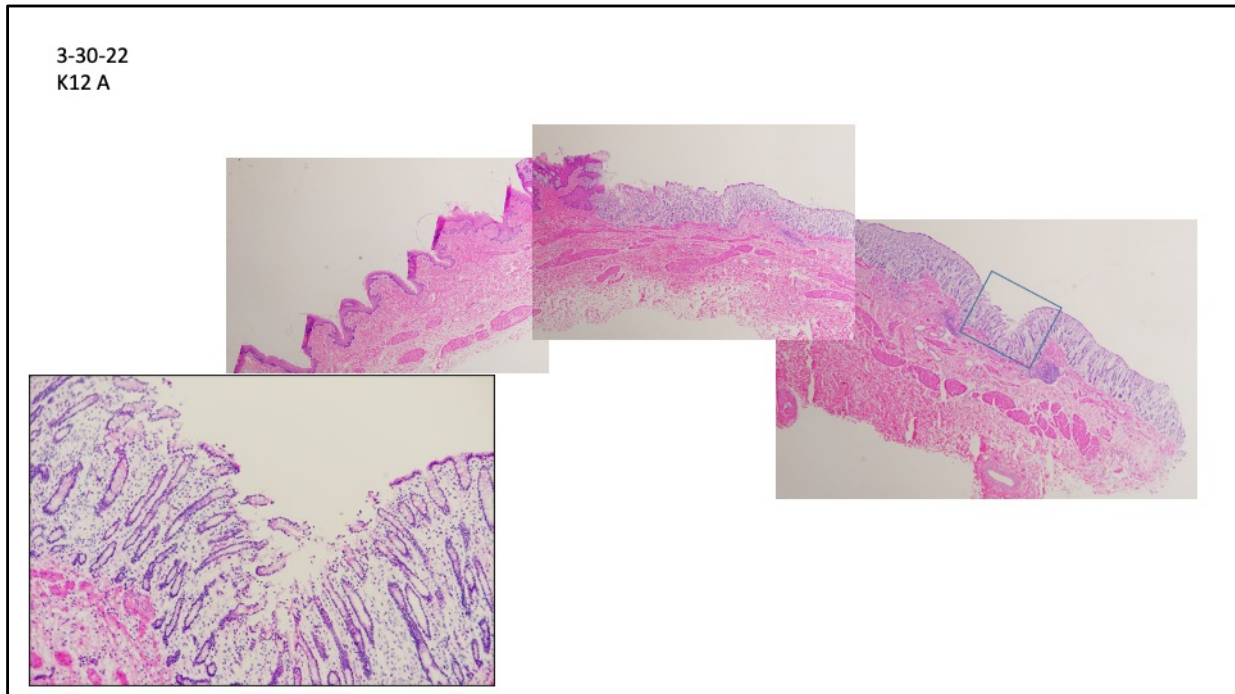

3-30-22

K12 A

Small superficial disruption of mucosa in columnar region.

Small amount GALT

Normal squamous region.



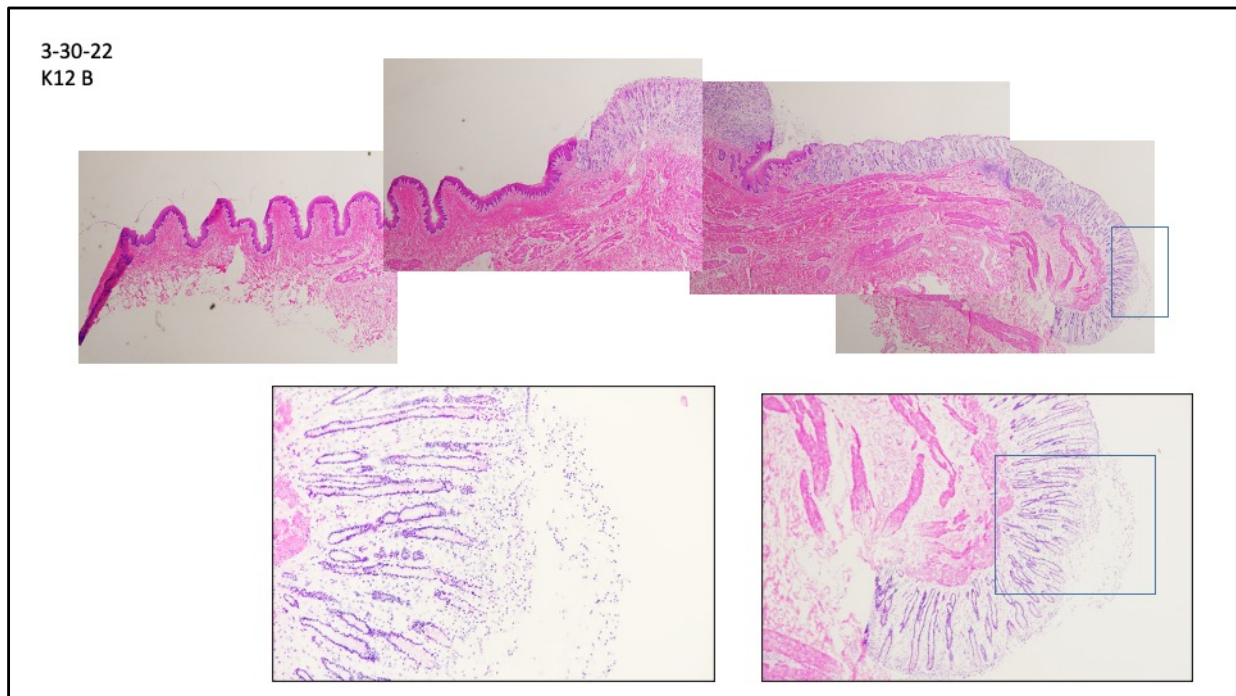

3-30-22

K12 B

Small superficial disruption of mucosa in columnar region.

Small amount of GALT.

Normal squamous region.

5-18-22

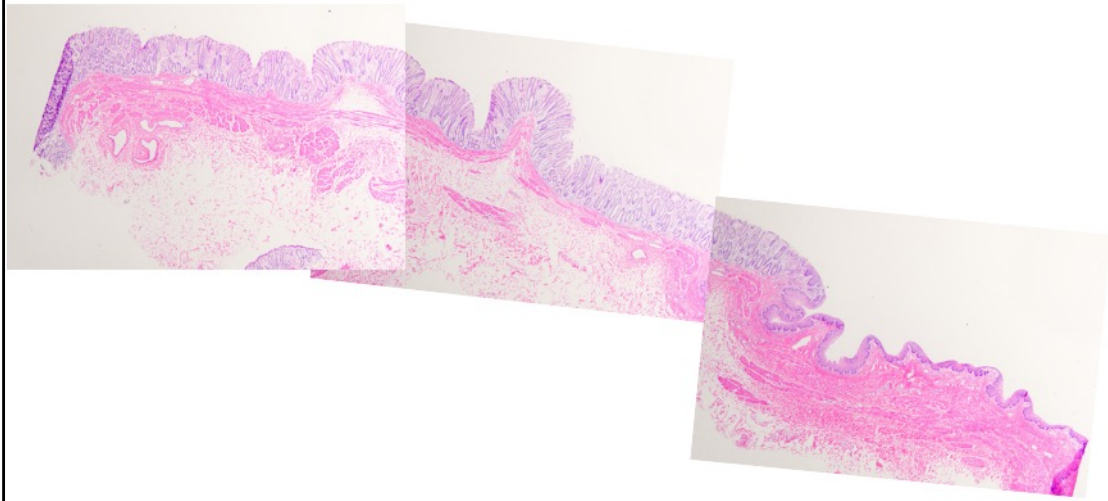

5-18-22

Pre-Assay

Excellent tissue morphology in all regions.

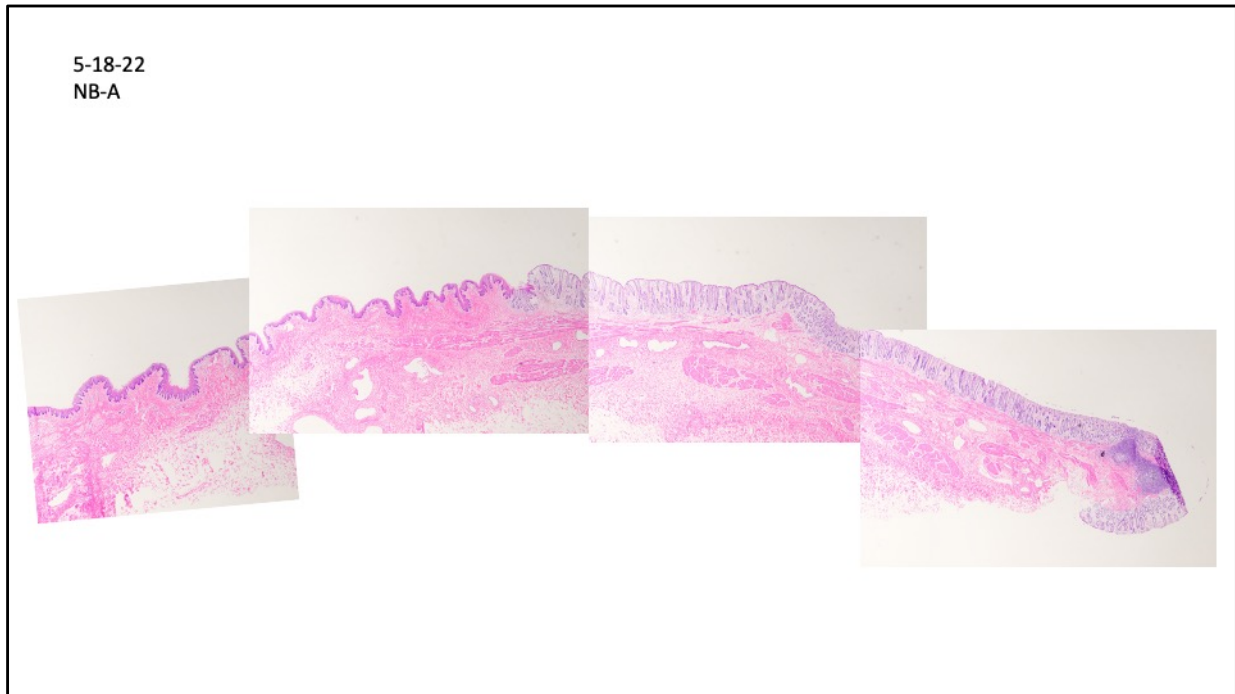

5-18-22  
NB-A  
Normal in all regions.  
Small amount of GALT.

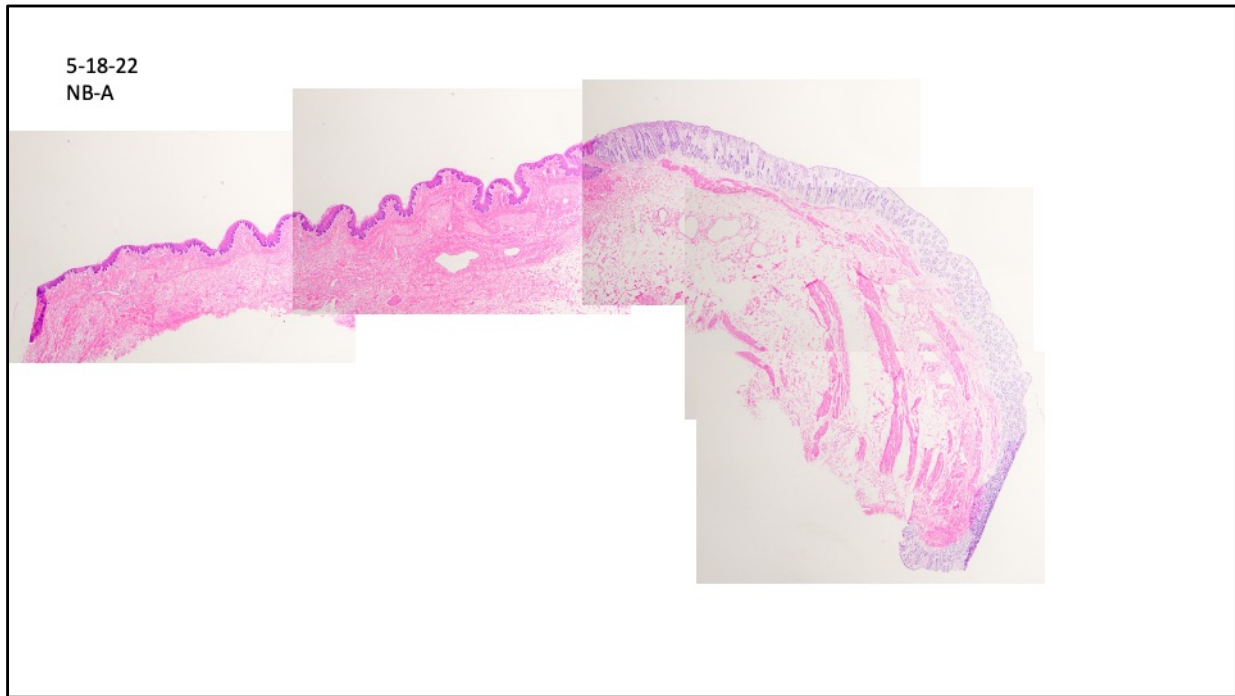

5-18-22  
NB-B  
Normal in all regions.  
No GALT.

5-18-22  
K12-A

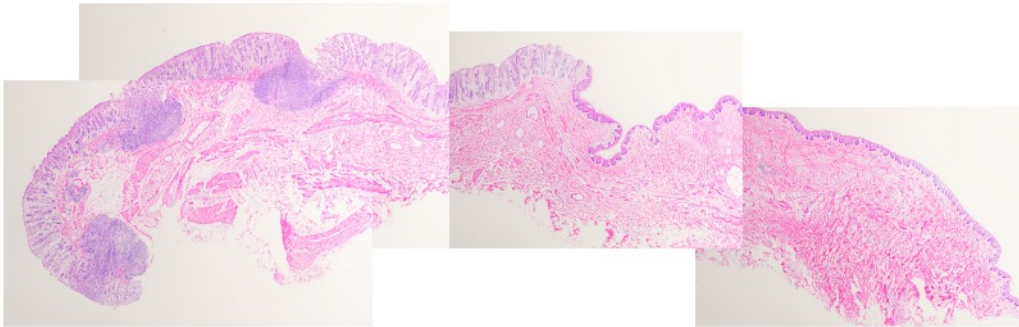

5-18-22

K12- A

Multiple small foci of superficial epithelial disruption.

Moderate to large amount of GALT.

Normal squamous region.

5-18-22  
K12-B

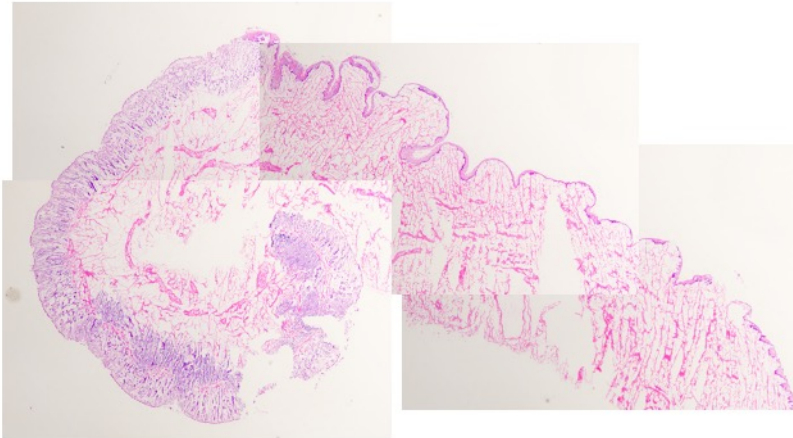

5-18-22  
K12-B  
Multiple foci of superficial epithelial disruption.  
Moderate amount of GALT.  
Freezing artifact.

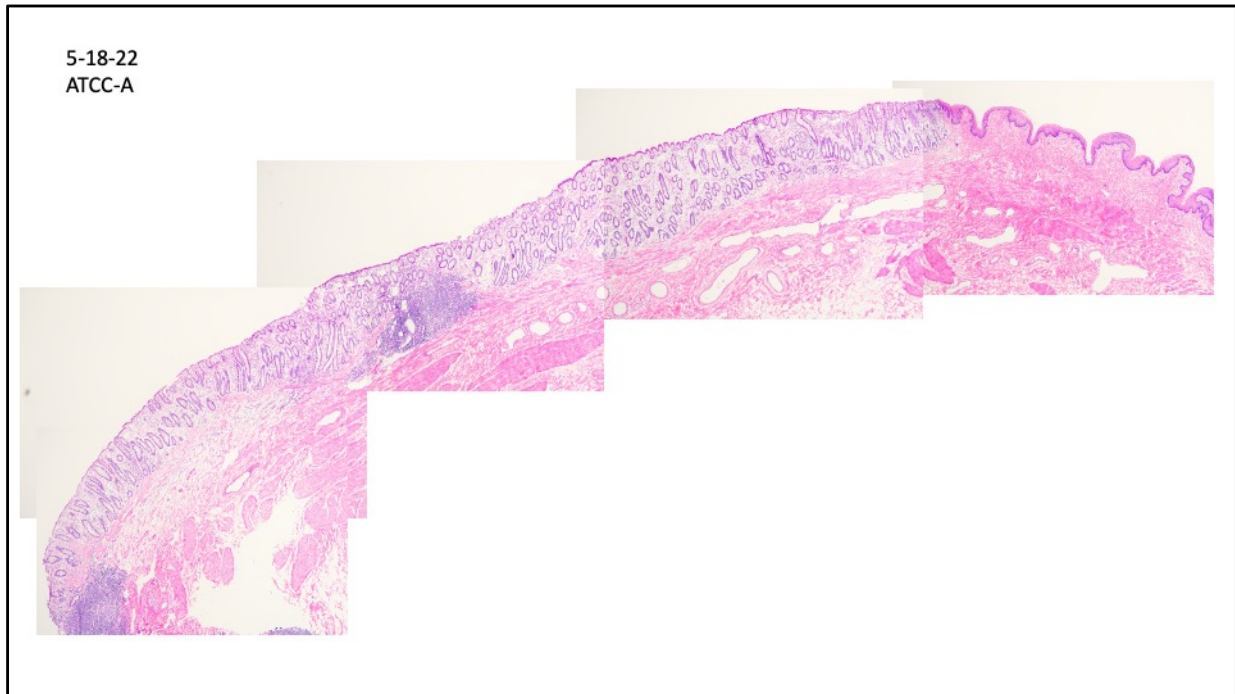

5-18-22  
ATCC-A  
Normal in all regions.  
Small amount of GALT.

5-18-22  
ATCC-B

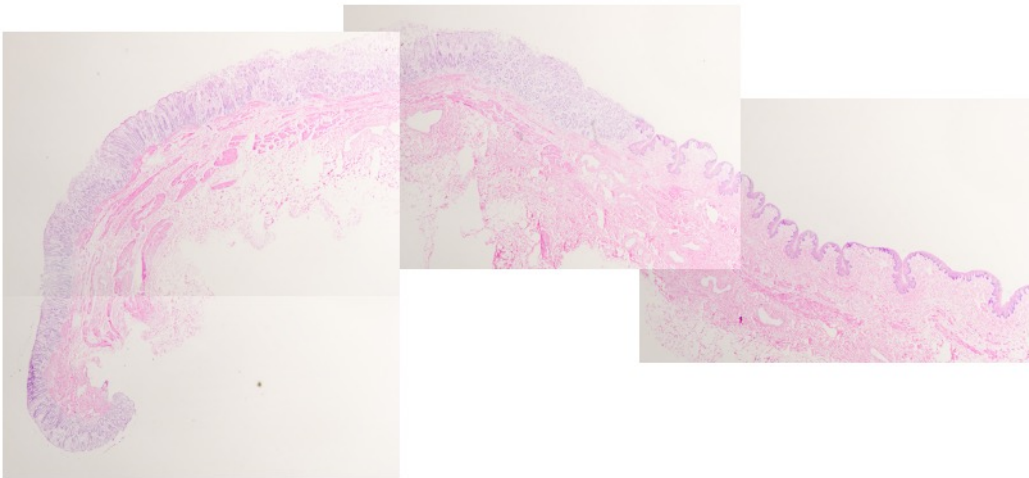

5-18-22  
ATCC-B  
Multiple foci of epithelial disruption.  
No GALT.



IVOC  
6-8-22  
Pre-Assay

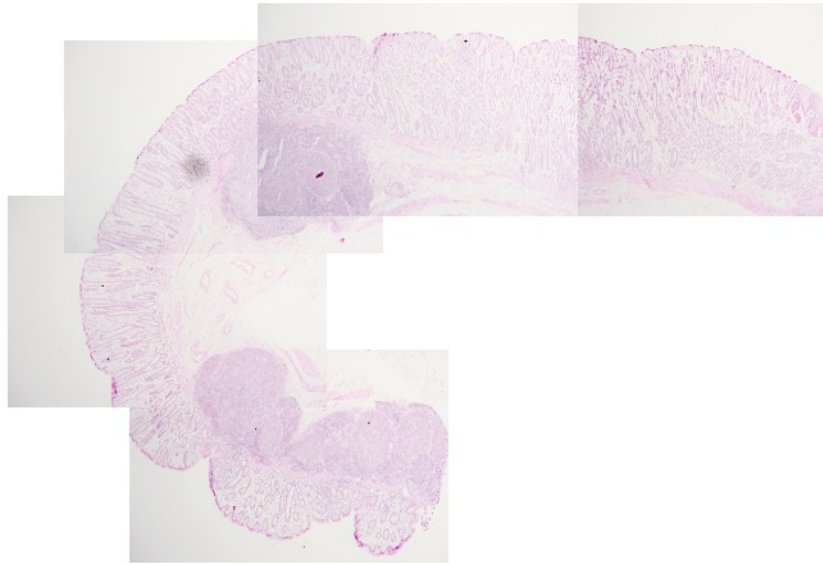

IVOC  
6-8-22  
Pre-Assay  
Excellent tissue integrity in all regions.

IVOC  
6-8-22  
Pre-Assay

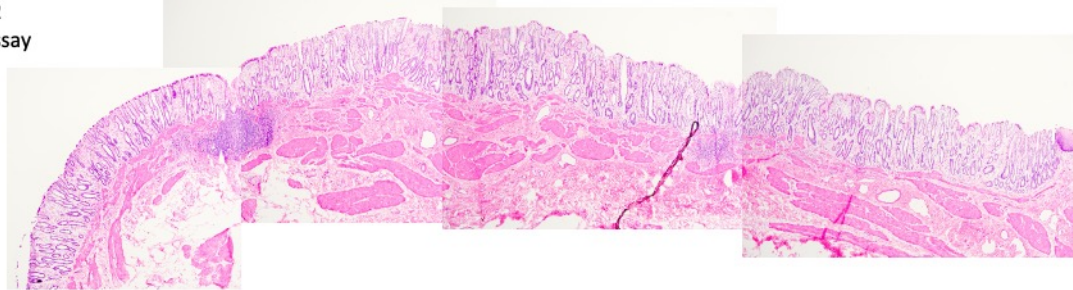

IVOC  
6-8-22  
Pre-Assay  
Excellent tissue integrity in all regions.

IVOC  
6-8-22  
NB A

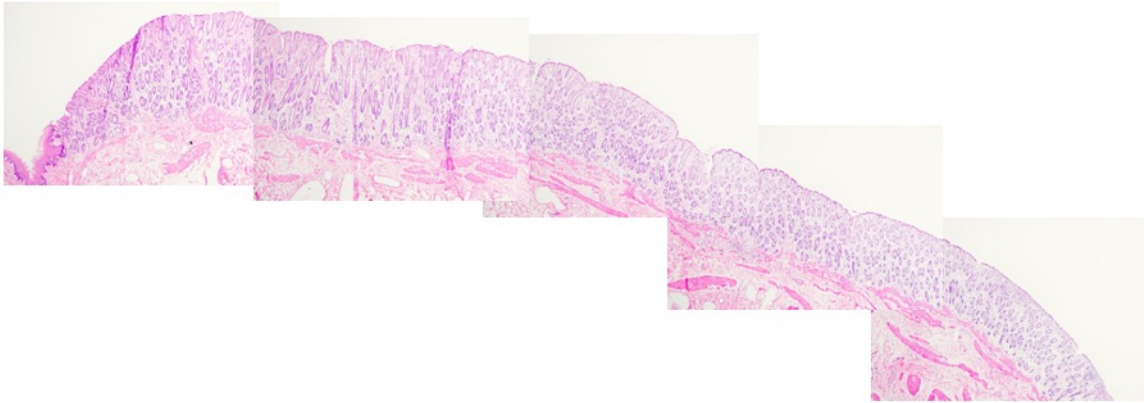

IVOC  
6-8-22  
NB A  
Excellent tissue integrity in all regions.

IVOC  
6-8-22  
NB B

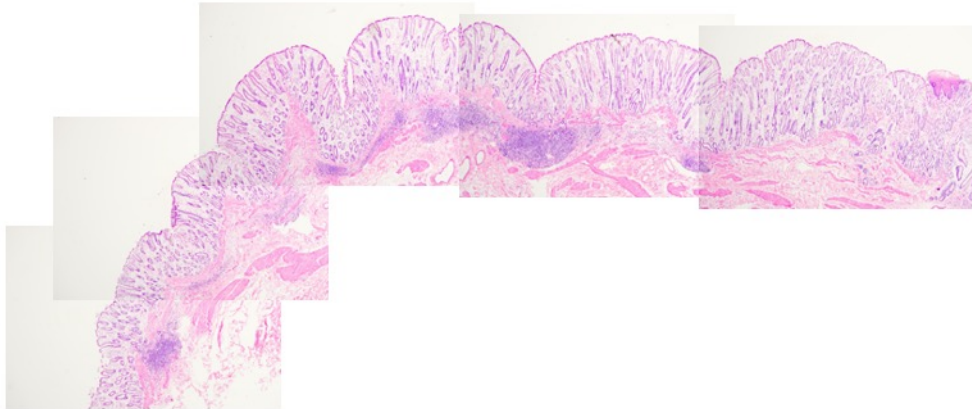

IVOC  
6-8-22  
NB B  
Excellent tissue integrity in all regions.

IVOC  
6-8-22  
ATCC A

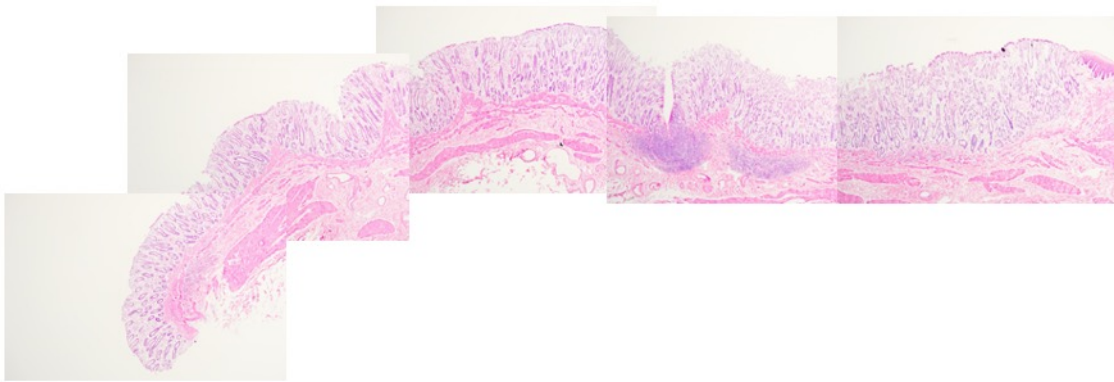

IVOC

6-8-22

ATCC A

>50% of superficial epithelium disrupted in columnar region.

Normal squamous region.

IVOC  
6-8-22  
ATCC B

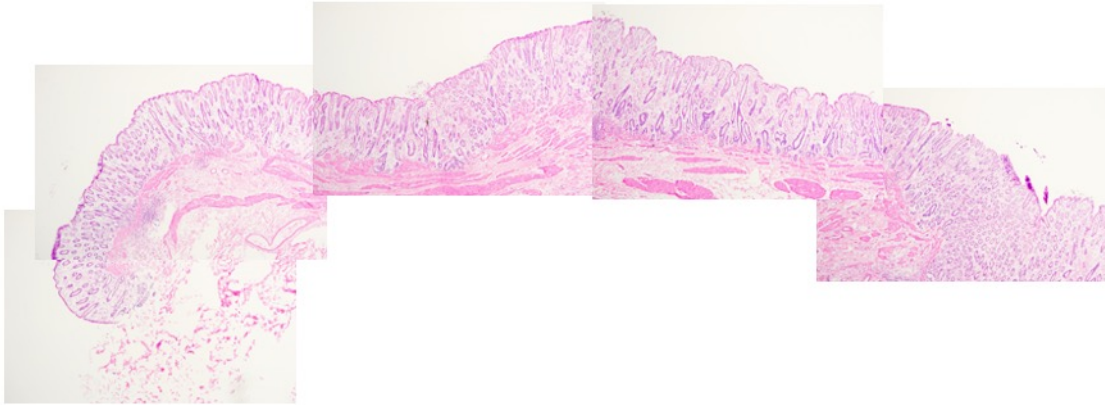

IVOC  
6-8-22  
ATCC B

Approx 25% of superficial mucosa disrupted in columnar region.  
Normal squamous region.

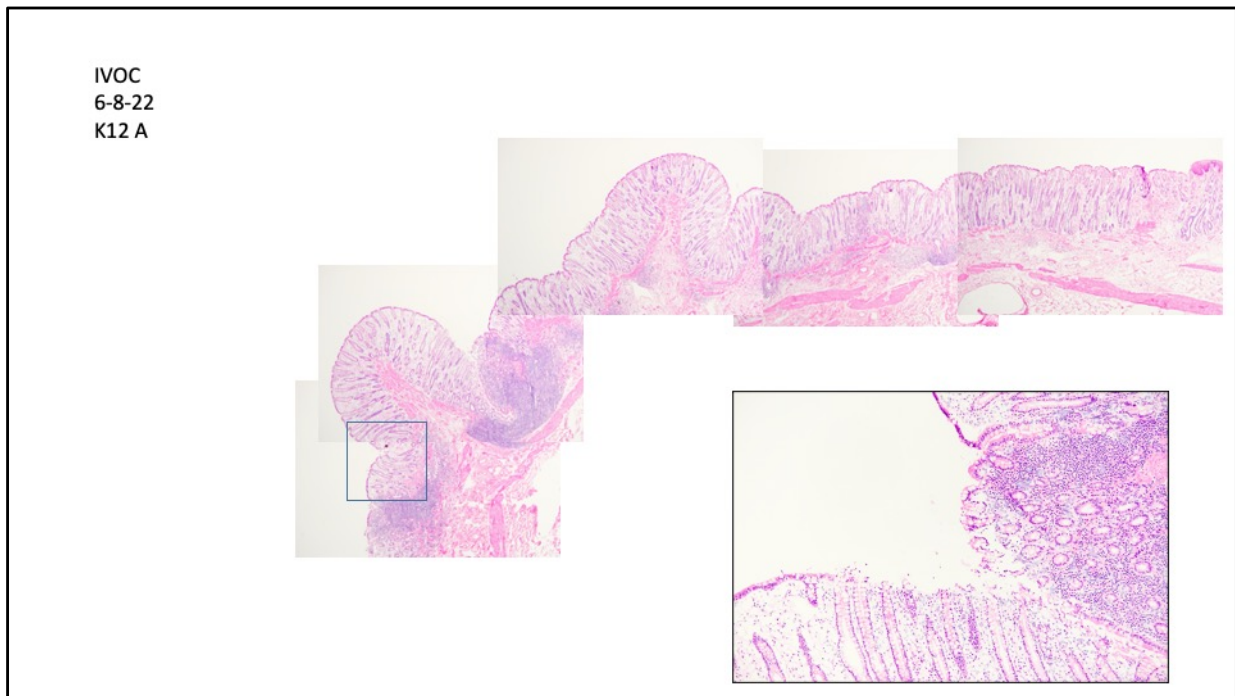

IVOC  
6-8-22  
K12 A  
Focal loss of superficial mucosa.  
Normal squamous region.

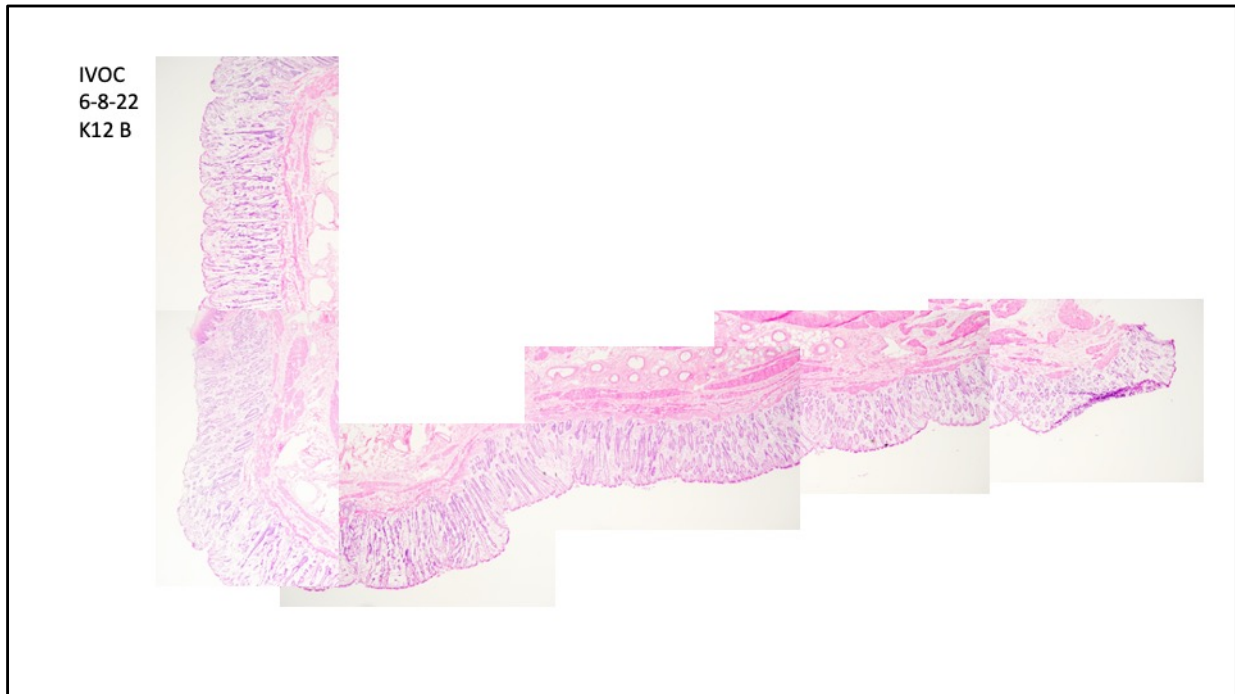

IVOC  
6-8-22  
K12 B  
Excellent tissue integrity in all regions.
