# Supplementary material for: Bovine Rectoanal Junction In Vitro Organ Culture Model System to Study Shiga Toxin-Producing Escherichia coli Adherence
Source: MDPI journal article supplement (doi:10.3390/microorganisms11051289), 2023-05-15
Supplement: s1 [file s1]

Dr. Indira Kudva

Histopathology Results  
IVOC samples from 11-10-21  
by  
Dr. Mitchell Palmer

## Summary- 11/10/21

- Slide set 11/10/21
  - Slides with GALT hyperplasia. In many cases where there were submucosal follicles, lymphocytes extended from the submucosa and in the lamina propria lymphocytes extended toward superficial mucosa.
  - All squamous regions were normal except EDL 933 B.
  - Pretty normal NB and K12 with NB A having a small region of mucosal disruption in columnar region.
  - EDL 933: A has significant disruption with part of the superficial layer detached in columnar region. B has an interesting area of attenuation and cell infiltrates in the squamous portion.

11/10/21: NB

- Squamous portion of RAJ (both A and B): normal
- Columnar portion of RAJ:
  - NB A- small focus of superficial mucosal disruption
  - NB B- normal
  - Both NB A and B have moderate to prominent GALT hyperplasia with lymphocytes extending from the submucosa superficially towards the superficial mucosal.

11/10/21: K12

- Squamous portion of RAJ (both A and B): normal
- Columnar portion of RAJ:
  - K12 A: normal mucosa. Prominent GALT hyperplasia with lymphocytes extending from the submucosa superficially towards the superficial mucosal. Single folding artifact.
  - K12 B: normal mucosa. Prominent GALT hyperplasia with lymphocytes extending from the submucosa superficially towards the superficial mucosal.

## 11/10/21 : EDL 933

- Squamous portion of RAJ:
  - EDL 933 A: normal
  - EDL 933 B: small region of attenuation with subjacent cellular infiltrates involving approximately 10% of the length of the mucosa.
- Columnar portion of RAJ:
  - EDL 933 A: there is superficial mucosal disruption involving approximately 40% of the length of the mucosa, with a significant portion of superficial mucosa lifted off from the remaining mucosal layer.
  - EDL 933 B: normal, GALT with lymphocytes extending superficially from submucosa towards mucosa.

NB A  
11/10/21

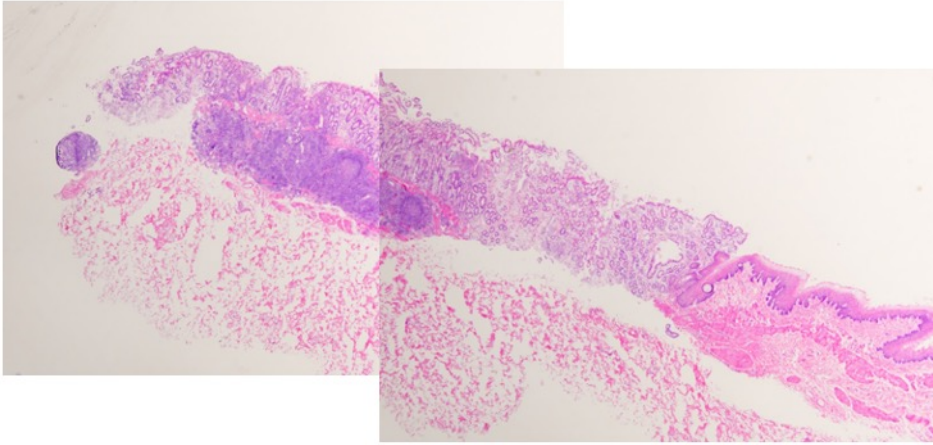

Squamous portion of RAL: normal  
Columnar portion of RAJ: normal

NB B  
11/10/21

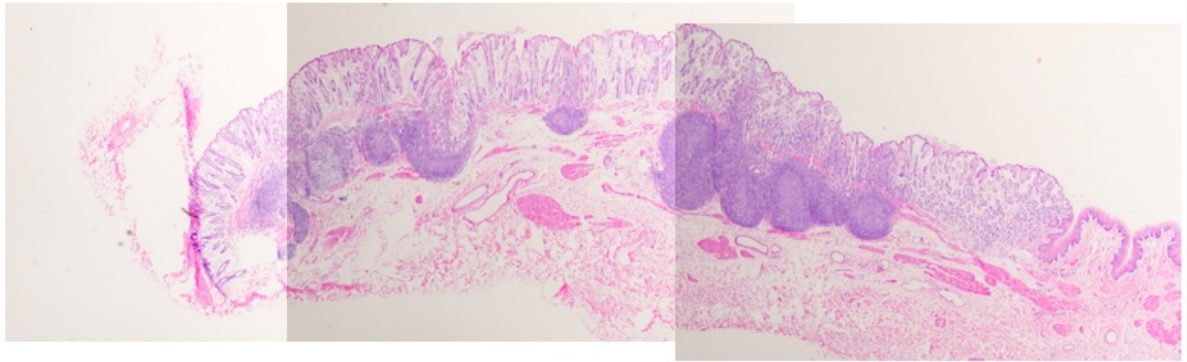

Squamous portion of RAL: normal

Columnar portion of RAJ: normal

Prominent GALT hyperplasia with multiple foci extending superficially through lamina propria

K12 A  
11/10/21

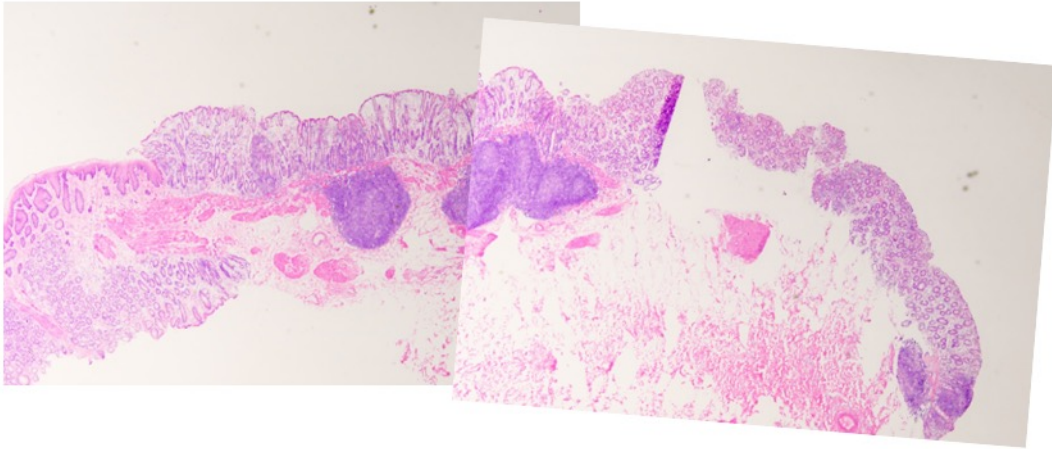

Squamous portion of RAL: normal  
Columnar portion of RAJ: normal  
Moderate GALT hyperplasia with foci extending superficially into lamina propria.  
Single folding artifact.



K12 B  
11/10/21

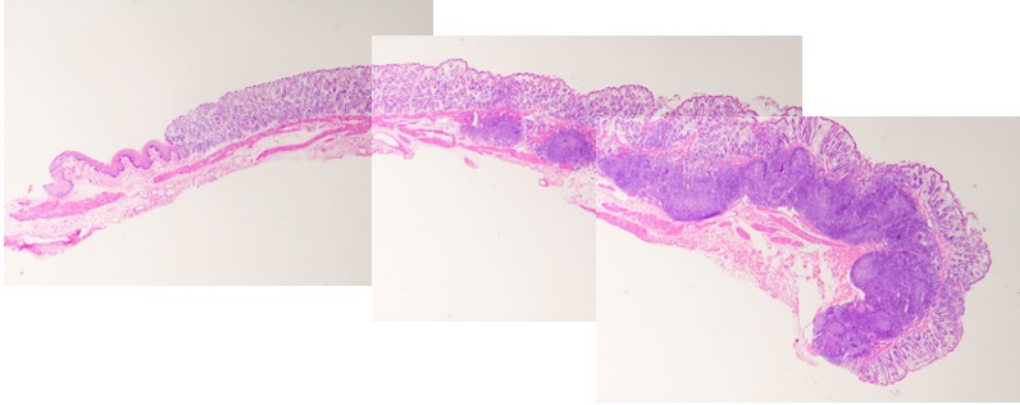

Squamous portion of RAL: normal  
Columnar portion of RAJ: normal  
Prominent GALT hyperplasia with foci extending superficially into lamina propria.

EDL 933 A

11/10/21

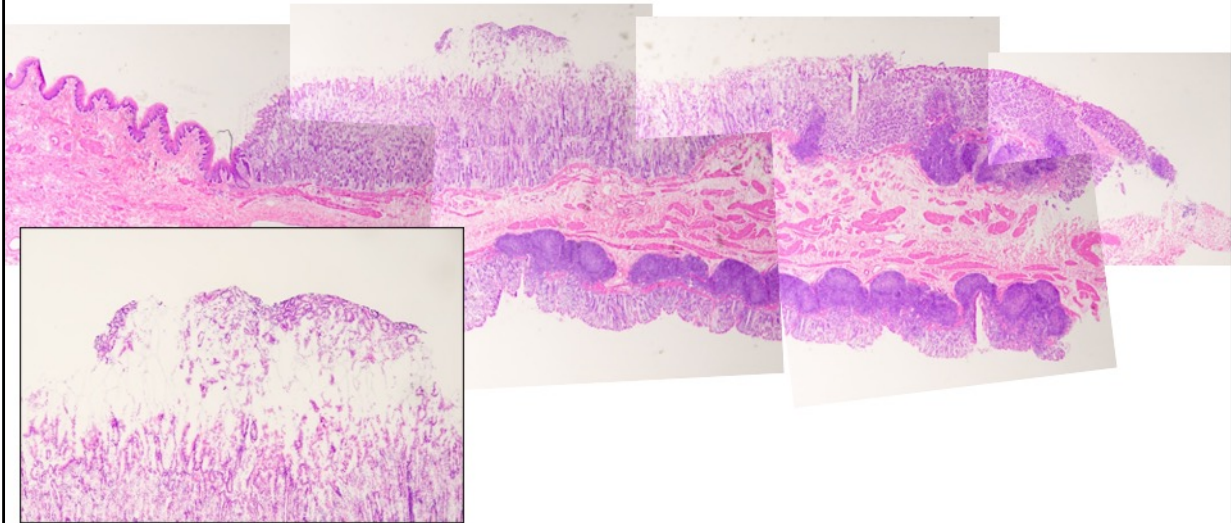

Squamous portion of RAJ: normal

Columnar portion of RAJ: significant mucosal disruption (40%), with some areas extending deeper into lamina propria. Sizeable portion of mucosa lifted off surface. Prominent GALT hyperplasia.

EDL 933 B  
11/10/21

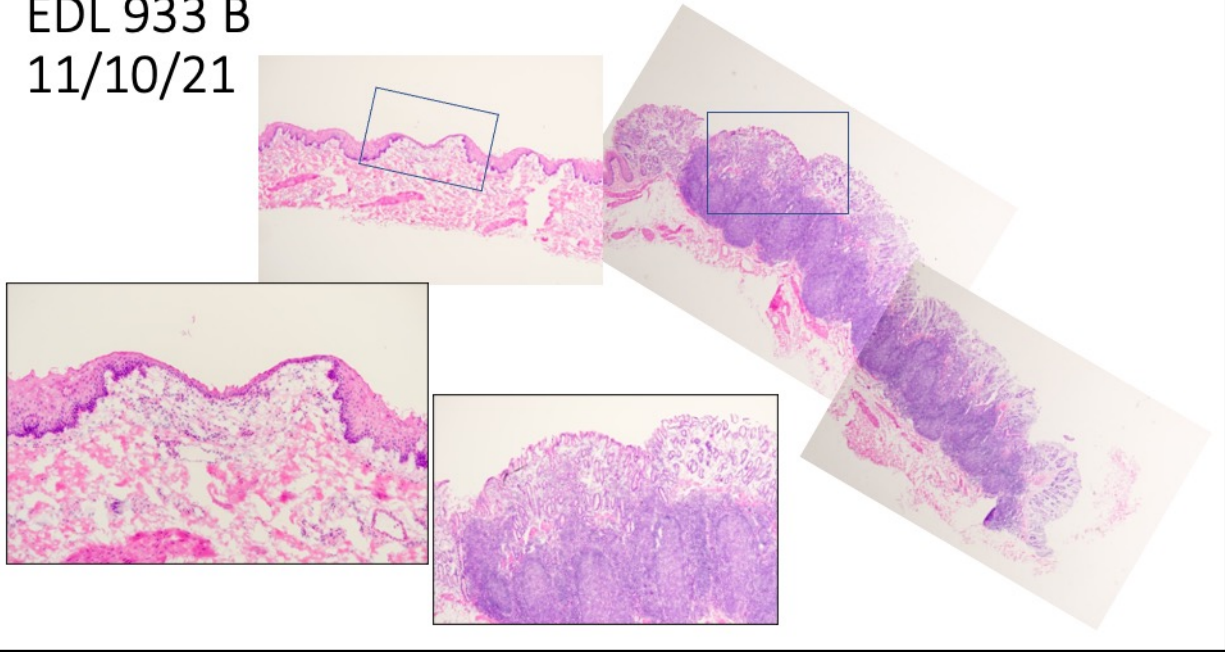

Squamous portion of IAJ: small focus of attenuated mucosa with subjacent, mild infiltrates of cells

Columnar portion of IAJ: multiple small foci of mucosal disruption

Prominent GALT hyperplasia with lymphocytes extending superficially towards mucosal layer
